# Supplementary material for: Reinvestigation of the ionic conductivity of a layered Li(BH3NH2BH2NH2BH3) salt
Source: Royal Society of Chemistry journal article supplement (doi:10.1039/d4qi01595a), 2024-10-10
Supplement: d4qi01595a1.pdf [file d4qi01595a1.pdf]

## ELECTRONIC SUPPLEMENTARY INFORMATION

### “Reinvestigation of ionic conductivity of a layered $\text{Li}(\text{BH}_3\text{NH}_2\text{BH}_2\text{NH}_2\text{BH}_3)$ salt”

A. Prus<sup>1</sup>, R. Owarzany<sup>1</sup>, D. Jezierski<sup>1</sup>, M. Rzepecka<sup>1</sup>, W. Grochala<sup>1</sup>, P. Połczyński<sup>2\*</sup>, K. J. Fijałkowski<sup>1\*</sup>

1. Centre of New Technologies, University of Warsaw, ul. Banacha 2c, 02-097 Warsaw, POLAND

2. Faculty of Chemistry, University of Warsaw, ul. Pasteura 1, 02-089 Warsaw, POLAND

#### Contents:

1. Synthesis of  $\text{Li}(\text{BH}_3\text{NH}_2\text{BH}_2\text{NH}_2\text{BH}_3)$
2.  $^7\text{Li}$  MAS NMR of  $\text{Li}(\text{BH}_3\text{NH}_2\text{BH}_2\text{NH}_2\text{BH}_3)$
3. Crystal structure and Rietveld fit for  $\text{Li}(\text{BH}_3\text{NH}_2\text{BH}_2\text{NH}_2\text{BH}_3)$
4. EIS spectra of pristine  $\text{Li}(\text{BH}_3\text{NH}_2\text{BH}_2\text{NH}_2\text{BH}_3)$  at 9°C, 16°C, 21°C, 32°C, 40°C, 48°C, 56°C and 65°C

### 1. Synthesis of Li(BH<sub>3</sub>NH<sub>2</sub>BH<sub>2</sub>NH<sub>2</sub>BH<sub>3</sub>):

We used the highest purity available substrates: NH<sub>3</sub>BH<sub>3</sub> (98%, JSC Aviabor), LiH (95%, Sigma Aldrich), which were stored and manipulated under inert atmosphere of argon (5.0) inside a MBRAUN Labmaster DP or Vigor SG1200 gloveboxes (both O<sub>2</sub> < 1.0 ppm; H<sub>2</sub>O < 1.0 ppm).

**Novel direct method** of synthesis of Li[B<sub>3</sub>N<sub>3</sub>] consists of two stages: grinding of ammonia borane with lithium hydride in molar ratio 1:3 in agate mortar and pestle for ca. 60 seconds at room temperature under argon atmosphere resulting in homogenous mixture of the reactants, which is further heated at 75°C for 2 hours. Upon heating, a gaseous mixture of ammonia and hydrogen is being desorbed along with formation of Li[B<sub>3</sub>N<sub>2</sub>]:

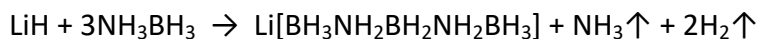

## 2. $^7\text{Li}$ MAS NMR of $\text{Li}(\text{BH}_3\text{NH}_2\text{BH}_2\text{NH}_2\text{BH}_3)$ :

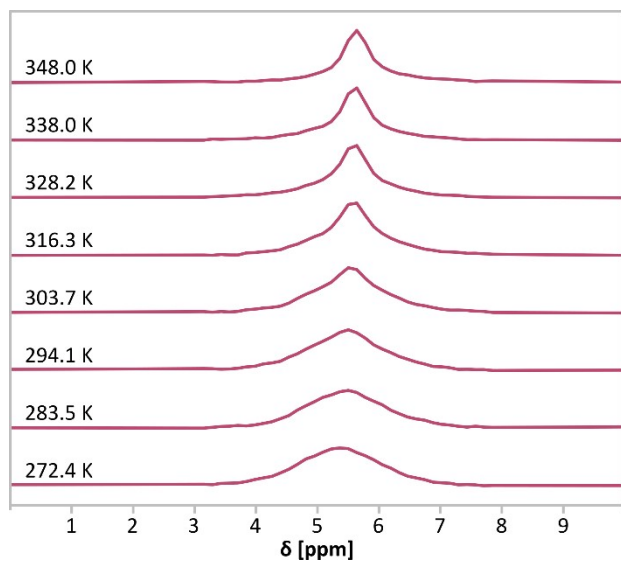

**Fig. S2.1.** Comparison of  $^7\text{Li}$  MAS NMR spectra of  $\text{Li}[\text{B}_3\text{N}_2]$  collected in the temperature range of 0–65°C.

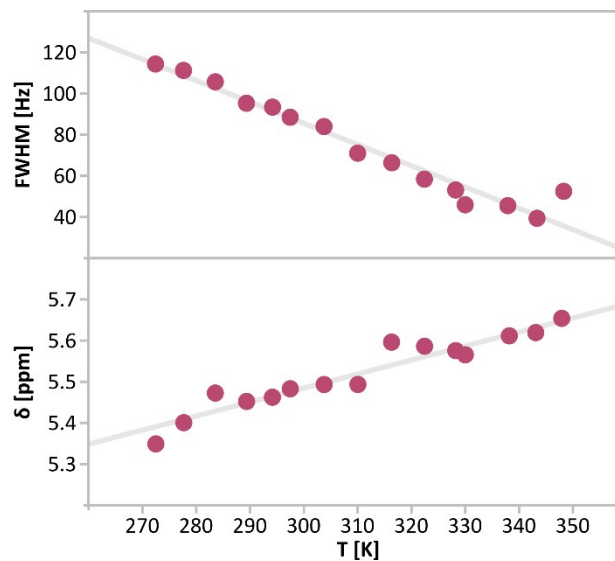

**Fig. S2.2.** Results  $^7\text{Li}$  MAS NMR study of  $\text{Li}[\text{B}_3\text{N}_2]$ : temperature dependence of half width and chemical shift of the peak .

### 3. Crystal structure and Rietveld fit for $\text{Li}(\text{BH}_3\text{NH}_2\text{BH}_2\text{NH}_2\text{BH}_3)$ :

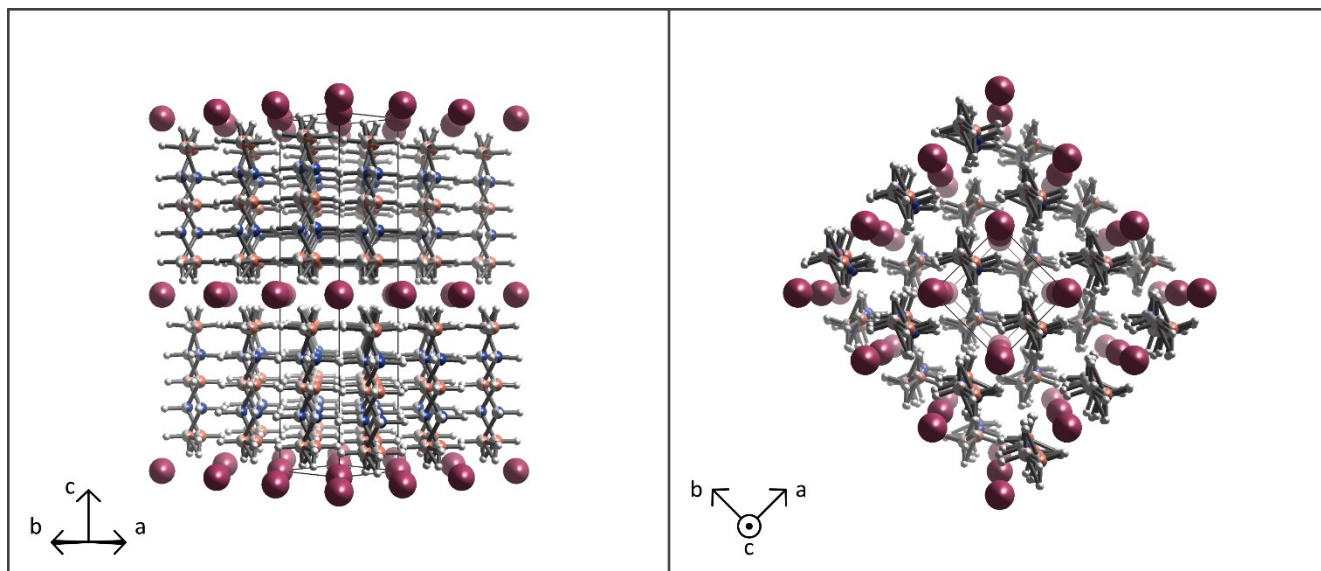

Fig. S3.1. Crystal structure of  $\text{Li}[\text{B}_3\text{N}_2]$ .

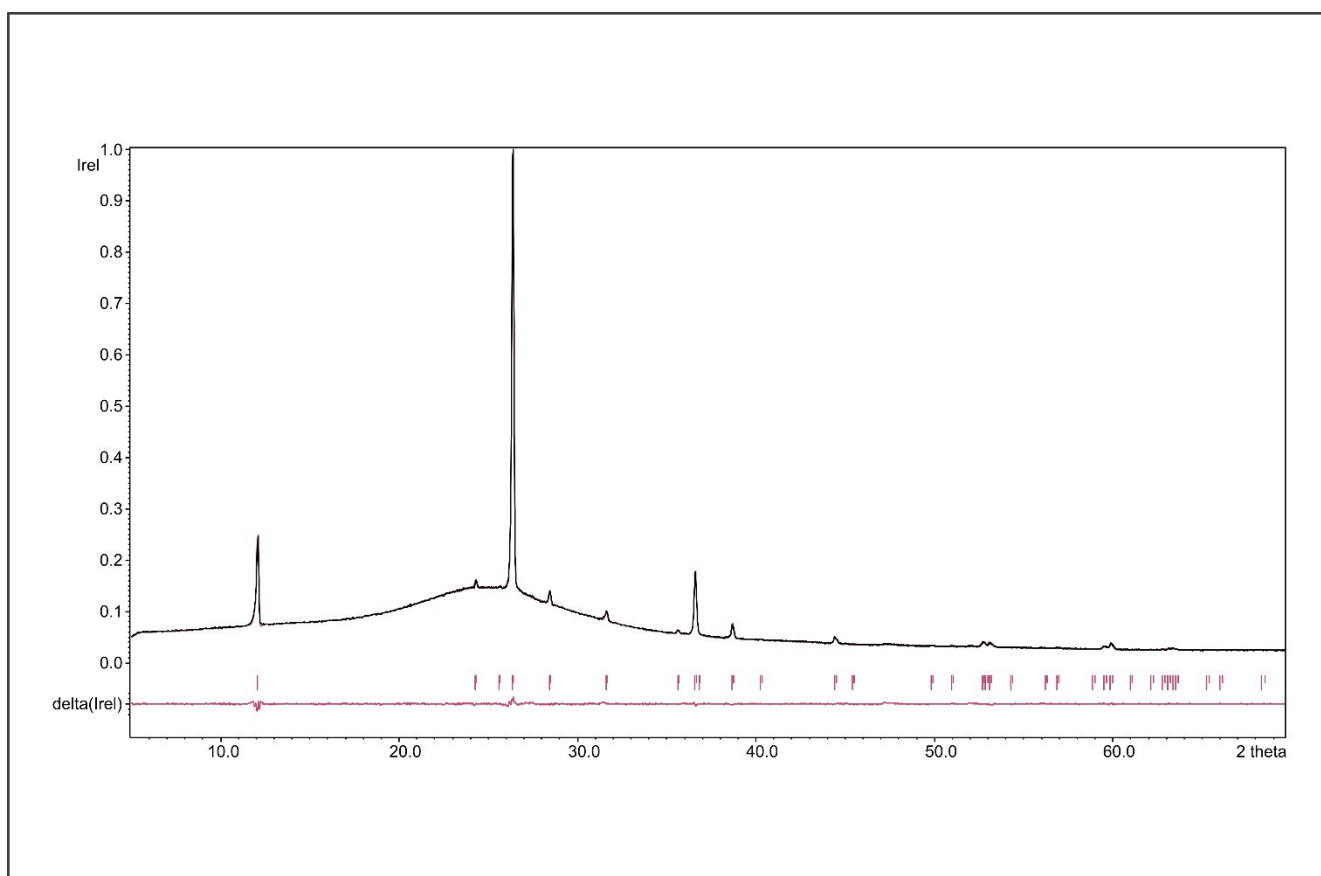

Fig. S3.2. Rietveld analysis of  $\text{Li}[\text{B}_3\text{N}_2]$  powder pattern.

4. EIS spectra of pristine Li(BH<sub>3</sub>NH<sub>2</sub>BH<sub>2</sub>NH<sub>2</sub>BH<sub>3</sub>) at 9°C and 16°C

[1/4]

| Li(B3N2) / 9°C |           |           |           |           | Li(B3N2) / 16°C |           |           |           |           |
|----------------|-----------|-----------|-----------|-----------|-----------------|-----------|-----------|-----------|-----------|
| f              | phi (f)   | mod z (f) | Z'        | Z'' (Z')  | f               | phi (f)   | mod z (f) | Z'        | Z'' (Z')  |
| 1.00E+07       | -6.74E+01 | 7.48E+03  | 2.88E+03  | 6.90E+03  | 1.00E+07        | -6.74E+01 | 7.12E+03  | 2.74E+03  | 6.57E+03  |
| 7.94E+06       | -4.88E+01 | 7.77E+03  | 5.12E+03  | 5.85E+03  | 7.94E+06        | -4.79E+01 | 7.65E+03  | 5.13E+03  | 5.68E+03  |
| 6.31E+06       | -8.83E+01 | 1.55E+04  | 4.63E+02  | 1.52E+04  | 6.31E+06        | -8.74E+01 | 1.52E+04  | 7.04E+02  | 1.52E+04  |
| 5.01E+06       | -8.25E+01 | 1.78E+04  | 2.34E+03  | 1.76E+04  | 5.01E+06        | -8.14E+01 | 1.75E+04  | 2.61E+03  | 1.73E+04  |
| 3.98E+06       | 8.72E+01  | 2.26E+04  | -1.13E+03 | 2.26E+04  | 3.98E+06        | 8.85E+01  | 2.27E+04  | -6.14E+02 | 2.27E+04  |
| 3.16E+06       | 7.25E+01  | 4.87E+04  | -1.47E+04 | 4.64E+04  | 3.16E+06        | 7.52E+01  | 4.80E+04  | -1.23E+04 | 4.64E+04  |
| 2.51E+06       | 8.09E+01  | 3.04E+04  | -4.84E+03 | 3.01E+04  | 2.51E+06        | 8.19E+01  | 3.00E+04  | -4.24E+03 | 2.97E+04  |
| 2.00E+06       | -2.52E+01 | 9.85E+04  | -8.91E+04 | -4.19E+04 | 2.00E+06        | -2.40E+01 | 1.01E+05  | -9.27E+04 | -4.12E+04 |
| 1.58E+06       | 7.55E+01  | 4.82E+05  | -1.21E+05 | 4.67E+05  | 1.58E+06        | 8.63E+01  | 4.39E+05  | -2.88E+04 | 4.38E+05  |
| 1.26E+06       | -8.10E+01 | 3.03E+05  | 4.74E+04  | 2.99E+05  | 1.26E+06        | -7.66E+01 | 2.76E+05  | 6.44E+04  | 2.68E+05  |
| 1.00E+06       | -8.05E+01 | 3.05E+05  | 5.04E+04  | 3.00E+05  | 1.00E+06        | -7.66E+01 | 2.79E+05  | 6.48E+04  | 2.71E+05  |
| 7.94E+05       | -7.86E+01 | 3.49E+05  | 6.93E+04  | 3.42E+05  | 7.94E+05        | -7.59E+01 | 3.16E+05  | 7.69E+04  | 3.06E+05  |
| 6.31E+05       | -7.81E+01 | 4.11E+05  | 8.52E+04  | 4.02E+05  | 6.31E+05        | -7.50E+01 | 3.72E+05  | 9.63E+04  | 3.59E+05  |
| 5.01E+05       | -7.83E+01 | 4.93E+05  | 1.00E+05  | 4.83E+05  | 5.01E+05        | -7.39E+01 | 4.45E+05  | 1.23E+05  | 4.27E+05  |
| 3.98E+05       | -7.73E+01 | 5.98E+05  | 1.31E+05  | 5.83E+05  | 3.98E+05        | -7.26E+01 | 5.34E+05  | 1.60E+05  | 5.10E+05  |
| 3.16E+05       | -7.62E+01 | 7.26E+05  | 1.74E+05  | 7.05E+05  | 3.16E+05        | -7.10E+01 | 6.42E+05  | 2.09E+05  | 6.07E+05  |
| 2.51E+05       | -7.49E+01 | 8.82E+05  | 2.30E+05  | 8.52E+05  | 2.51E+05        | -6.93E+01 | 7.71E+05  | 2.73E+05  | 7.21E+05  |
| 2.00E+05       | -7.31E+01 | 1.07E+06  | 3.10E+05  | 1.02E+06  | 2.00E+05        | -6.73E+01 | 9.23E+05  | 3.57E+05  | 8.52E+05  |
| 1.58E+05       | -7.16E+01 | 1.29E+06  | 4.07E+05  | 1.22E+06  | 1.58E+05        | -6.51E+01 | 1.10E+06  | 4.64E+05  | 9.99E+05  |
| 1.26E+05       | -6.99E+01 | 1.55E+06  | 5.33E+05  | 1.46E+06  | 1.26E+05        | -6.27E+01 | 1.31E+06  | 6.01E+05  | 1.16E+06  |
| 1.00E+05       | -6.81E+01 | 1.86E+06  | 6.95E+05  | 1.73E+06  | 1.00E+05        | -6.02E+01 | 1.53E+06  | 7.60E+05  | 1.33E+06  |
| 7.94E+04       | -6.61E+01 | 2.22E+06  | 9.00E+05  | 2.03E+06  | 7.94E+04        | -5.76E+01 | 1.79E+06  | 9.59E+05  | 1.51E+06  |
| 6.31E+04       | -6.39E+01 | 2.64E+06  | 1.16E+06  | 2.37E+06  | 6.31E+04        | -5.47E+01 | 2.08E+06  | 1.20E+06  | 1.69E+06  |
| 5.01E+04       | -6.16E+01 | 3.12E+06  | 1.48E+06  | 2.74E+06  | 5.01E+04        | -5.17E+01 | 2.39E+06  | 1.48E+06  | 1.88E+06  |
| 3.98E+04       | -5.91E+01 | 3.66E+06  | 1.88E+06  | 3.14E+06  | 3.98E+04        | -4.86E+01 | 2.73E+06  | 1.81E+06  | 2.05E+06  |
| 3.16E+04       | -5.65E+01 | 4.28E+06  | 2.36E+06  | 3.56E+06  | 3.16E+04        | -4.54E+01 | 3.09E+06  | 2.17E+06  | 2.20E+06  |
| 2.51E+04       | -5.36E+01 | 4.96E+06  | 2.94E+06  | 3.99E+06  | 2.51E+04        | -4.20E+01 | 3.47E+06  | 2.58E+06  | 2.32E+06  |
| 2.00E+04       | -5.06E+01 | 5.70E+06  | 3.62E+06  | 4.40E+06  | 2.00E+04        | -3.86E+01 | 3.85E+06  | 3.01E+06  | 2.40E+06  |
| 1.58E+04       | -4.74E+01 | 6.49E+06  | 4.40E+06  | 4.77E+06  | 1.58E+04        | -3.52E+01 | 4.22E+06  | 3.45E+06  | 2.43E+06  |
| 1.26E+04       | -4.40E+01 | 7.32E+06  | 5.26E+06  | 5.09E+06  | 1.26E+04        | -3.18E+01 | 4.59E+06  | 3.90E+06  | 2.42E+06  |
| 1.00E+04       | -4.06E+01 | 8.17E+06  | 6.21E+06  | 5.32E+06  | 1.00E+04        | -2.86E+01 | 4.94E+06  | 4.34E+06  | 2.36E+06  |
| 7.94E+03       | -3.71E+01 | 9.03E+06  | 7.20E+06  | 5.45E+06  | 7.94E+03        | -2.55E+01 | 5.26E+06  | 4.75E+06  | 2.26E+06  |
| 6.31E+03       | -3.37E+01 | 9.86E+06  | 8.21E+06  | 5.47E+06  | 6.31E+03        | -2.25E+01 | 5.55E+06  | 5.13E+06  | 2.13E+06  |
| 5.01E+03       | -3.03E+01 | 1.07E+07  | 9.20E+06  | 5.38E+06  | 5.01E+03        | -1.98E+01 | 5.81E+06  | 5.47E+06  | 1.97E+06  |
| 3.98E+03       | -2.71E+01 | 1.14E+07  | 1.02E+07  | 5.19E+06  | 3.98E+03        | -1.74E+01 | 6.04E+06  | 5.77E+06  | 1.80E+06  |
| 3.16E+03       | -2.40E+01 | 1.21E+07  | 1.11E+07  | 4.92E+06  | 3.16E+03        | -1.52E+01 | 6.24E+06  | 6.02E+06  | 1.63E+06  |
| 2.51E+03       | -2.12E+01 | 1.27E+07  | 1.19E+07  | 4.59E+06  | 2.51E+03        | -1.32E+01 | 6.41E+06  | 6.24E+06  | 1.47E+06  |
| 2.00E+03       | -1.86E+01 | 1.33E+07  | 1.26E+07  | 4.22E+06  | 2.00E+03        | -1.15E+01 | 6.56E+06  | 6.43E+06  | 1.31E+06  |
| 1.58E+03       | -1.62E+01 | 1.37E+07  | 1.32E+07  | 3.84E+06  | 1.58E+03        | -9.99E+00 | 6.69E+06  | 6.59E+06  | 1.16E+06  |
| 1.26E+03       | -1.41E+01 | 1.42E+07  | 1.37E+07  | 3.45E+06  | 1.26E+03        | -8.68E+00 | 6.80E+06  | 6.73E+06  | 1.03E+06  |
| 1.00E+03       | -1.23E+01 | 1.45E+07  | 1.42E+07  | 3.08E+06  | 1.00E+03        | -7.55E+00 | 6.90E+06  | 6.84E+06  | 9.06E+05  |
| 7.94E+02       | -1.06E+01 | 1.48E+07  | 1.46E+07  | 2.73E+06  | 7.94E+02        | -6.58E+00 | 6.98E+06  | 6.94E+06  | 7.99E+05  |
| 6.31E+02       | -9.22E+00 | 1.51E+07  | 1.49E+07  | 2.42E+06  | 6.31E+02        | -5.74E+00 | 7.06E+06  | 7.02E+06  | 7.06E+05  |
| 5.01E+02       | -7.98E+00 | 1.53E+07  | 1.52E+07  | 2.13E+06  | 5.01E+02        | -5.02E+00 | 7.12E+06  | 7.10E+06  | 6.24E+05  |
| 3.98E+02       | -6.92E+00 | 1.55E+07  | 1.54E+07  | 1.87E+06  | 3.98E+02        | -4.42E+00 | 7.18E+06  | 7.16E+06  | 5.53E+05  |
| 3.16E+02       | -6.01E+00 | 1.57E+07  | 1.56E+07  | 1.64E+06  | 3.16E+02        | -3.90E+00 | 7.23E+06  | 7.21E+06  | 4.92E+05  |
| 2.51E+02       | -5.22E+00 | 1.58E+07  | 1.58E+07  | 1.44E+06  | 2.51E+02        | -3.47E+00 | 7.27E+06  | 7.26E+06  | 4.40E+05  |
| 2.00E+02       | -4.57E+00 | 1.59E+07  | 1.59E+07  | 1.27E+06  | 2.00E+02        | -3.09E+00 | 7.31E+06  | 7.30E+06  | 3.94E+05  |
| 1.58E+02       | -4.01E+00 | 1.61E+07  | 1.60E+07  | 1.12E+06  | 1.58E+02        | -2.80E+00 | 7.34E+06  | 7.33E+06  | 3.59E+05  |
| 1.26E+02       | -3.53E+00 | 1.62E+07  | 1.61E+07  | 9.94E+05  | 1.26E+02        | -2.56E+00 | 7.37E+06  | 7.37E+06  | 3.29E+05  |
| 1.00E+02       | -3.12E+00 | 1.62E+07  | 1.62E+07  | 8.83E+05  | 1.00E+02        | -2.35E+00 | 7.40E+06  | 7.40E+06  | 3.04E+05  |
| 7.94E+01       | -2.79E+00 | 1.63E+07  | 1.63E+07  | 7.95E+05  | 7.94E+01        | -2.21E+00 | 7.43E+06  | 7.42E+06  | 2.86E+05  |
| 6.31E+01       | -2.52E+00 | 1.64E+07  | 1.64E+07  | 7.21E+05  | 6.31E+01        | -2.11E+00 | 7.45E+06  | 7.45E+06  | 2.74E+05  |
| 5.01E+01       | -3.08E+00 | 1.64E+07  | 1.63E+07  | 8.80E+05  | 5.01E+01        | -1.68E+00 | 7.47E+06  | 7.46E+06  | 2.18E+05  |
| 3.98E+01       | -2.18E+00 | 1.65E+07  | 1.65E+07  | 6.27E+05  | 3.98E+01        | -2.02E+00 | 7.51E+06  | 7.51E+06  | 2.64E+05  |
| 3.16E+01       | -2.10E+00 | 1.66E+07  | 1.66E+07  | 6.06E+05  | 3.16E+01        | -2.02E+00 | 7.54E+06  | 7.53E+06  | 2.65E+05  |
| 2.51E+01       | -1.98E+00 | 1.66E+07  | 1.66E+07  | 5.73E+05  | 2.51E+01        | -2.08E+00 | 7.57E+06  | 7.56E+06  | 2.74E+05  |
| 2.00E+01       | -1.93E+00 | 1.67E+07  | 1.67E+07  | 5.60E+05  | 2.00E+01        | -2.15E+00 | 7.60E+06  | 7.60E+06  | 2.86E+05  |
| 1.58E+01       | -1.94E+00 | 1.67E+07  | 1.67E+07  | 5.66E+05  | 1.58E+01        | -2.24E+00 | 7.64E+06  | 7.63E+06  | 2.99E+05  |
| 1.26E+01       | -1.96E+00 | 1.68E+07  | 1.68E+07  | 5.75E+05  | 1.26E+01        | -2.40E+00 | 7.67E+06  | 7.67E+06  | 3.21E+05  |
| 1.00E+01       | -2.02E+00 | 1.68E+07  | 1.68E+07  | 5.94E+05  | 1.00E+01        | -2.57E+00 | 7.71E+06  | 7.70E+06  | 3.46E+05  |
| 7.94E+00       | -2.09E+00 | 1.69E+07  | 1.69E+07  | 6.16E+05  | 7.94E+00        | -2.77E+00 | 7.75E+06  | 7.74E+06  | 3.75E+05  |
| 6.31E+00       | -2.26E+00 | 1.70E+07  | 1.70E+07  | 6.68E+05  | 6.31E+00        | -3.02E+00 | 7.79E+06  | 7.78E+06  | 4.10E+05  |
| 5.01E+00       | -2.42E+00 | 1.70E+07  | 1.70E+07  | 7.19E+05  | 5.01E+00        | -3.29E+00 | 7.83E+06  | 7.82E+06  | 4.49E+05  |
| 3.98E+00       | -2.64E+00 | 1.71E+07  | 1.71E+07  | 7.88E+05  | 3.98E+00        | -3.61E+00 | 7.88E+06  | 7.86E+06  | 4.96E+05  |
| 3.16E+00       | -2.86E+00 | 1.72E+07  | 1.72E+07  | 8.59E+05  | 3.16E+00        | -3.94E+00 | 7.93E+06  | 7.91E+06  | 5.45E+05  |
| 2.51E+00       | -3.14E+00 | 1.73E+07  | 1.73E+07  | 9.47E+05  | 2.51E+00        | -4.33E+00 | 7.99E+06  | 7.97E+06  | 6.04E+05  |
| 2.00E+00       | -3.46E+00 | 1.74E+07  | 1.74E+07  | 1.05E+06  | 2.00E+00        | -4.74E+00 | 8.06E+06  | 8.03E+06  | 6.66E+05  |
| 1.58E+00       | -3.82E+00 | 1.75E+07  | 1.75E+07  | 1.16E+06  | 1.58E+00        | -5.21E+00 | 8.14E+06  | 8.10E+06  | 7.39E+05  |
| 1.26E+00       | -4.23E+00 | 1.76E+07  | 1.76E+07  | 1.30E+06  | 1.26E+00        | -5.71E+00 | 8.23E+06  | 8.19E+06  | 8.19E+05  |
| 1.00E+00       | -4.68E+00 | 1.78E+07  | 1.77E+07  | 1.45E+06  | 1.00E+00        | -6.24E+00 | 8.32E+06  | 8.27E+06  | 9.04E+05  |
| 7.94E-01       | -5.15E+00 | 1.79E+07  | 1.79E+07  | 1.61E+06  | 7.94E-01        | -6.84E+00 | 8.42E+06  | 8.36E+06  | 1.00E+06  |
| 6.31E-01       | -5.68E+00 | 1.81E+07  | 1.80E+07  | 1.79E+06  | 6.31E-01        | -7.45E+00 | 8.54E+06  | 8.47E+06  | 1.11E+06  |
| 5.01E-01       | -6.28E+00 | 1.83E+07  | 1.82E+07  | 2.00E+06  | 5.01E-01        | -8.14E+00 | 8.67E+06  | 8.59E+06  | 1.23E+06  |
| 3.98E-01       | -6.86E+00 | 1.85E+07  | 1.84E+07  | 2.21E+06  | 3.98E-01        | -8.82E+00 | 8.80E+06  | 8.70E+06  | 1.35E+06  |
| 3.16E-01       | -7.51E+00 | 1.88E+07  | 1.86E+07  | 2.45E+06  | 3.16E-01        | -9.58E+00 | 8.96E+06  | 8.84E+06  | 1.49E+06  |
| 2.51E-01       | -8.22E+00 | 1.91E+07  | 1.89E+07  | 2.72E+06  | 2.51E-01        | -1.04E+01 | 9.13E+06  | 8.98E+06  | 1.65E+06  |
| 2.00E-01       | -9.03E+00 | 1.94E+07  | 1.91E+07  | 3.03E+06  | 2.00E-01        | -1.13E+01 | 9.30E+06  | 9.12E+06  | 1.83E+06  |
| 1.58E-01       | -9.93E+00 | 1.97E+07  | 1.94E+07  | 3.40E+06  | 1.58E-01        | -1.24E+01 | 9.54E+06  | 9.31E+06  | 2.04E+06  |
| 1.26E-01       | -1.07E+01 | 2.01E+07  | 1.98E+07  | 3.75E+06  | 1.26E-01        | -1.33E+01 | 9.77E+06  | 9.51E+06  | 2.24E+06  |
| 1.00E-01       | -1.19E+01 | 2.06E+07  | 2.01E+07  | 4.22E+06  | 1.00E-01        | -1.45E+01 | 1.01E+07  | 9.75E+06  | 2.53E+06  |
| 7.94E-02       | -1.28E+01 | 2.10E+07  | 2.05E+07  | 4.67E+06  | 7.94E-02        | -1.57E+01 | 1.03E+07  | 9.94E+06  | 2.79E+06  |
| 6.31E-02       | -1.39E+01 | 2.16E+07  | 2.10E+07  | 5.19E+06  | 6.31E-02        | -1.69E+01 | 1.07E+07  | 1.02E+07  | 3.10E+06  |
| 5.01E-02       | -1.53E+01 | 2.23E+07  | 2.15E+07  | 5.86E+06  | 5.01E-02        | -1.84E+01 | 1.11E+07  | 1.05E+07  | 3.51E+06  |
| 3.98E-02       | -1.65E+01 | 2.29E+07  | 2.20E+07  | 6.52E+06  | 3.98E-02        | -1.98E+01 | 1.15E+07  | 1.09E+07  | 3.91E+06  |
| 3.16E-02       | -1.77E+01 | 2.37E+07  | 2.26E+07  | 7.24E+06  | 3.16E-02        | -2.11E+01 | 1.20E+07  | 1.12E+07  | 4.33E+06  |
| 2.51E-02       | -1.90E+01 | 2.47E+07  | 2.33E+07  | 8.04E+06  | 2.51E-02        | -2.24E+01 | 1.26E+07  | 1.17E+07  | 4.82E+06  |
| 2.00E-02       | -2.03E+01 | 2.58E+07  | 2.42E+07  | 8.94E+06  | 2.00E-02        | -2.38E+01 | 1.33E+07  | 1.22E+07  | 5.37E+06  |
| 1.59E-02       | -2.18E+01 | 2.70E+07  | 2.50E+07  | 1.00E+07  | 1.59E-02        | -2.52E+01 | 1.41E+07  | 1.27E+07  | 5.99E+06  |
| 1.26E-02       | -2.30E+01 | 2.82E+07  | 2.60E+07  | 1.1       |                 |           |           |           |           |

4. EIS spectra of pristine Li(BH<sub>3</sub>NH<sub>2</sub>BH<sub>2</sub>NH<sub>2</sub>BH<sub>3</sub>) at 21°C and 32°C

[2/4]

| Li(B3N2) / 21°C |           |           |           |           | Li(B3N2) / 32°C |           |           |           |           |
|-----------------|-----------|-----------|-----------|-----------|-----------------|-----------|-----------|-----------|-----------|
| f               | phi (f)   | mod z (f) | Z'        | Z'' (Z')  | f               | phi (f)   | mod z (f) | Z'        | Z'' (Z')  |
| 1.00E+07        | -6.64E+01 | 7.04E+03  | 2.82E+03  | 6.45E+03  | 1.00E+07        | -6.43E+01 | 7.19E+03  | 3.12E+03  | 6.47E+03  |
| 7.94E+06        | -4.67E+01 | 7.51E+03  | 5.15E+03  | 5.46E+03  | 7.94E+06        | -4.55E+01 | 7.36E+03  | 5.16E+03  | 5.25E+03  |
| 6.31E+06        | -8.53E+01 | 1.49E+04  | 1.24E+03  | 1.49E+04  | 6.31E+06        | -8.30E+01 | 1.47E+04  | 1.81E+03  | 1.46E+04  |
| 5.01E+06        | -8.02E+01 | 1.70E+04  | 2.92E+03  | 1.68E+04  | 5.01E+06        | -7.87E+01 | 1.66E+04  | 3.26E+03  | 1.63E+04  |
| 3.98E+06        | 8.99E+01  | 2.21E+04  | -4.49E+01 | 2.21E+04  | 3.98E+06        | -8.91E+01 | 2.13E+04  | 3.66E+02  | 2.13E+04  |
| 3.16E+06        | 7.74E+01  | 4.67E+04  | -1.02E+04 | 4.56E+04  | 3.16E+06        | 7.99E+01  | 4.54E+04  | -7.99E+03 | 4.47E+04  |
| 2.51E+06        | 8.32E+01  | 2.95E+04  | -3.50E+03 | 2.93E+04  | 2.51E+06        | 8.48E+01  | 2.89E+04  | -2.65E+03 | 2.88E+04  |
| 2.00E+06        | -1.74E+01 | 1.01E+05  | -9.67E+04 | -3.02E+04 | 2.00E+06        | -1.62E+01 | 1.09E+05  | -1.05E+05 | -3.04E+04 |
| 1.58E+06        | -7.82E+01 | 3.81E+05  | 7.83E+04  | 3.73E+05  | 1.58E+06        | -6.93E+01 | 3.12E+05  | 1.11E+05  | 2.92E+05  |
| 1.26E+06        | -7.18E+01 | 2.48E+05  | 7.76E+04  | 2.35E+05  | 1.26E+06        | -6.67E+01 | 2.19E+05  | 8.68E+04  | 2.01E+05  |
| 1.00E+06        | -7.22E+01 | 2.51E+05  | 7.68E+04  | 2.39E+05  | 1.00E+06        | -6.75E+01 | 2.23E+05  | 8.55E+04  | 2.06E+05  |
| 7.94E+05        | -7.16E+01 | 2.84E+05  | 8.99E+04  | 2.69E+05  | 7.94E+05        | -6.67E+01 | 2.52E+05  | 9.97E+04  | 2.31E+05  |
| 6.31E+05        | -7.04E+01 | 3.33E+05  | 1.12E+05  | 3.13E+05  | 6.31E+05        | -6.53E+01 | 2.93E+05  | 1.22E+05  | 2.66E+05  |
| 5.01E+05        | -6.90E+01 | 3.94E+05  | 1.42E+05  | 3.68E+05  | 5.01E+05        | -6.35E+01 | 3.43E+05  | 1.54E+05  | 3.07E+05  |
| 3.98E+05        | -6.72E+01 | 4.69E+05  | 1.82E+05  | 4.32E+05  | 3.98E+05        | -6.13E+01 | 4.03E+05  | 1.94E+05  | 3.53E+05  |
| 3.16E+05        | -6.52E+01 | 5.57E+05  | 2.34E+05  | 5.05E+05  | 3.16E+05        | -5.88E+01 | 4.72E+05  | 2.45E+05  | 4.04E+05  |
| 2.51E+05        | -6.30E+01 | 6.59E+05  | 3.00E+05  | 5.87E+05  | 2.51E+05        | -5.60E+01 | 5.50E+05  | 3.07E+05  | 4.56E+05  |
| 2.00E+05        | -6.05E+01 | 7.77E+05  | 3.83E+05  | 6.76E+05  | 2.00E+05        | -5.31E+01 | 6.36E+05  | 3.82E+05  | 5.08E+05  |
| 1.58E+05        | -5.78E+01 | 9.10E+05  | 4.86E+05  | 7.70E+05  | 1.58E+05        | -4.99E+01 | 7.29E+05  | 4.70E+05  | 5.57E+05  |
| 1.26E+05        | -5.48E+01 | 1.06E+06  | 6.11E+05  | 8.65E+05  | 1.26E+05        | -4.65E+01 | 8.28E+05  | 5.71E+05  | 6.00E+05  |
| 1.00E+05        | -5.15E+01 | 1.22E+06  | 7.60E+05  | 9.55E+05  | 1.00E+05        | -4.30E+01 | 9.31E+05  | 6.81E+05  | 6.34E+05  |
| 7.94E+04        | -4.81E+01 | 1.39E+06  | 9.29E+05  | 1.03E+06  | 7.94E+04        | -3.93E+01 | 1.03E+06  | 8.00E+05  | 6.55E+05  |
| 6.31E+04        | -4.45E+01 | 1.57E+06  | 1.12E+06  | 1.10E+06  | 6.31E+04        | -3.57E+01 | 1.13E+06  | 9.21E+05  | 6.61E+05  |
| 5.01E+04        | -4.19E+01 | 1.76E+06  | 1.31E+06  | 1.17E+06  | 5.01E+04        | -3.23E+01 | 1.23E+06  | 1.04E+06  | 6.57E+05  |
| 3.98E+04        | -3.85E+01 | 1.95E+06  | 1.52E+06  | 1.21E+06  | 3.98E+04        | -2.91E+01 | 1.32E+06  | 1.15E+06  | 6.42E+05  |
| 3.16E+04        | -3.52E+01 | 2.14E+06  | 1.75E+06  | 1.23E+06  | 3.16E+04        | -2.62E+01 | 1.41E+06  | 1.26E+06  | 6.21E+05  |
| 2.51E+04        | -3.18E+01 | 2.32E+06  | 1.97E+06  | 1.22E+06  | 2.51E+04        | -2.35E+01 | 1.49E+06  | 1.36E+06  | 5.94E+05  |
| 2.00E+04        | -2.85E+01 | 2.49E+06  | 2.19E+06  | 1.19E+06  | 2.00E+04        | -2.10E+01 | 1.56E+06  | 1.46E+06  | 5.60E+05  |
| 1.58E+04        | -2.55E+01 | 2.66E+06  | 2.40E+06  | 1.14E+06  | 1.58E+04        | -1.86E+01 | 1.63E+06  | 1.55E+06  | 5.20E+05  |
| 1.26E+04        | -2.26E+01 | 2.80E+06  | 2.59E+06  | 1.08E+06  | 1.26E+04        | -1.63E+01 | 1.70E+06  | 1.63E+06  | 4.77E+05  |
| 1.00E+04        | -1.99E+01 | 2.94E+06  | 2.76E+06  | 9.98E+05  | 1.00E+04        | -1.43E+01 | 1.75E+06  | 1.70E+06  | 4.32E+05  |
| 7.94E+03        | -1.74E+01 | 3.05E+06  | 2.91E+06  | 9.14E+05  | 7.94E+03        | -1.21E+01 | 1.80E+06  | 1.76E+06  | 3.78E+05  |
| 6.31E+03        | -1.52E+01 | 3.16E+06  | 3.05E+06  | 8.28E+05  | 6.31E+03        | -1.05E+01 | 1.84E+06  | 1.81E+06  | 3.36E+05  |
| 5.01E+03        | -1.33E+01 | 3.24E+06  | 3.16E+06  | 7.44E+05  | 5.01E+03        | -9.13E+00 | 1.87E+06  | 1.85E+06  | 2.97E+05  |
| 3.98E+03        | -1.15E+01 | 3.32E+06  | 3.25E+06  | 6.63E+05  | 3.98E+03        | -7.92E+00 | 1.90E+06  | 1.88E+06  | 2.62E+05  |
| 3.16E+03        | -1.00E+01 | 3.39E+06  | 3.33E+06  | 5.89E+05  | 3.16E+03        | -6.89E+00 | 1.93E+06  | 1.91E+06  | 2.31E+05  |
| 2.51E+03        | -8.72E+00 | 3.44E+06  | 3.40E+06  | 5.22E+05  | 2.51E+03        | -6.02E+00 | 1.95E+06  | 1.94E+06  | 2.04E+05  |
| 2.00E+03        | -7.59E+00 | 3.49E+06  | 3.46E+06  | 4.61E+05  | 2.00E+03        | -5.25E+00 | 1.97E+06  | 1.96E+06  | 1.80E+05  |
| 1.58E+03        | -6.62E+00 | 3.53E+06  | 3.51E+06  | 4.07E+05  | 1.58E+03        | -4.61E+00 | 1.98E+06  | 1.98E+06  | 1.59E+05  |
| 1.26E+03        | -5.78E+00 | 3.57E+06  | 3.55E+06  | 3.59E+05  | 1.26E+03        | -4.05E+00 | 2.00E+06  | 1.99E+06  | 1.41E+05  |
| 1.00E+03        | -5.07E+00 | 3.61E+06  | 3.59E+06  | 3.18E+05  | 1.00E+03        | -3.59E+00 | 2.01E+06  | 2.00E+06  | 1.26E+05  |
| 7.94E+02        | -4.46E+00 | 3.63E+06  | 3.62E+06  | 2.82E+05  | 7.94E+02        | -3.19E+00 | 2.02E+06  | 2.02E+06  | 1.12E+05  |
| 6.31E+02        | -3.93E+00 | 3.66E+06  | 3.65E+06  | 2.51E+05  | 6.31E+02        | -2.87E+00 | 2.03E+06  | 2.03E+06  | 1.01E+05  |
| 5.01E+02        | -3.50E+00 | 3.68E+06  | 3.68E+06  | 2.25E+05  | 5.01E+02        | -2.60E+00 | 2.04E+06  | 2.04E+06  | 9.23E+04  |
| 3.98E+02        | -3.13E+00 | 3.71E+06  | 3.70E+06  | 2.02E+05  | 3.98E+02        | -2.38E+00 | 2.05E+06  | 2.05E+06  | 8.50E+04  |
| 3.16E+02        | -2.83E+00 | 3.73E+06  | 3.72E+06  | 1.84E+05  | 3.16E+02        | -2.21E+00 | 2.06E+06  | 2.05E+06  | 7.94E+04  |
| 2.51E+02        | -2.58E+00 | 3.74E+06  | 3.74E+06  | 1.69E+05  | 2.51E+02        | -2.09E+00 | 2.06E+06  | 2.06E+06  | 7.52E+04  |
| 2.00E+02        | -2.38E+00 | 3.76E+06  | 3.76E+06  | 1.56E+05  | 2.00E+02        | -2.00E+00 | 2.07E+06  | 2.07E+06  | 7.22E+04  |
| 1.58E+02        | -2.24E+00 | 3.77E+06  | 3.77E+06  | 1.47E+05  | 1.58E+02        | -1.96E+00 | 2.08E+06  | 2.08E+06  | 7.10E+04  |
| 1.26E+02        | -2.12E+00 | 3.79E+06  | 3.78E+06  | 1.40E+05  | 1.26E+02        | -1.94E+00 | 2.08E+06  | 2.08E+06  | 7.07E+04  |
| 1.00E+02        | -2.05E+00 | 3.80E+06  | 3.80E+06  | 1.36E+05  | 1.00E+02        | -1.97E+00 | 2.09E+06  | 2.09E+06  | 7.18E+04  |
| 7.94E+01        | -2.02E+00 | 3.81E+06  | 3.81E+06  | 1.34E+05  | 7.94E+01        | -2.01E+00 | 2.10E+06  | 2.10E+06  | 7.34E+04  |
| 6.31E+01        | -2.05E+00 | 3.83E+06  | 3.83E+06  | 1.37E+05  | 6.31E+01        | -2.10E+00 | 2.11E+06  | 2.10E+06  | 7.73E+04  |
| 5.01E+01        | -2.23E+00 | 3.84E+06  | 3.83E+06  | 1.49E+05  | 5.01E+01        | -2.19E+00 | 2.11E+06  | 2.11E+06  | 8.06E+04  |
| 3.98E+01        | -2.13E+00 | 3.86E+06  | 3.85E+06  | 1.44E+05  | 3.98E+01        | -2.37E+00 | 2.12E+06  | 2.12E+06  | 8.78E+04  |
| 3.16E+01        | -2.24E+00 | 3.87E+06  | 3.87E+06  | 1.51E+05  | 3.16E+01        | -2.55E+00 | 2.13E+06  | 2.13E+06  | 9.49E+04  |
| 2.51E+01        | -2.37E+00 | 3.89E+06  | 3.88E+06  | 1.61E+05  | 2.51E+01        | -2.76E+00 | 2.14E+06  | 2.14E+06  | 1.03E+05  |
| 2.00E+01        | -2.53E+00 | 3.91E+06  | 3.90E+06  | 1.72E+05  | 2.00E+01        | -3.01E+00 | 2.15E+06  | 2.15E+06  | 1.13E+05  |
| 1.58E+01        | -2.73E+00 | 3.92E+06  | 3.92E+06  | 1.87E+05  | 1.58E+01        | -3.27E+00 | 2.17E+06  | 2.16E+06  | 1.24E+05  |
| 1.26E+01        | -2.96E+00 | 3.94E+06  | 3.94E+06  | 2.04E+05  | 1.26E+01        | -3.59E+00 | 2.18E+06  | 2.18E+06  | 1.36E+05  |
| 1.00E+01        | -3.23E+00 | 3.97E+06  | 3.96E+06  | 2.23E+05  | 1.00E+01        | -3.93E+00 | 2.20E+06  | 2.19E+06  | 1.50E+05  |
| 7.94E+00        | -3.53E+00 | 3.99E+06  | 3.99E+06  | 2.46E+05  | 7.94E+00        | -4.30E+00 | 2.21E+06  | 2.21E+06  | 1.66E+05  |
| 6.31E+00        | -3.86E+00 | 4.02E+06  | 4.01E+06  | 2.70E+05  | 6.31E+00        | -4.71E+00 | 2.23E+06  | 2.22E+06  | 1.83E+05  |
| 5.01E+00        | -4.22E+00 | 4.05E+06  | 4.04E+06  | 2.98E+05  | 5.01E+00        | -5.15E+00 | 2.25E+06  | 2.24E+06  | 2.02E+05  |
| 3.98E+00        | -4.62E+00 | 4.09E+06  | 4.07E+06  | 3.29E+05  | 3.98E+00        | -5.62E+00 | 2.28E+06  | 2.27E+06  | 2.23E+05  |
| 3.16E+00        | -5.06E+00 | 4.12E+06  | 4.11E+06  | 3.64E+05  | 3.16E+00        | -6.13E+00 | 2.30E+06  | 2.29E+06  | 2.46E+05  |
| 2.51E+00        | -5.55E+00 | 4.16E+06  | 4.14E+06  | 4.03E+05  | 2.51E+00        | -6.69E+00 | 2.33E+06  | 2.31E+06  | 2.71E+05  |
| 2.00E+00        | -6.06E+00 | 4.21E+06  | 4.18E+06  | 4.44E+05  | 2.00E+00        | -7.27E+00 | 2.36E+06  | 2.34E+06  | 2.99E+05  |
| 1.58E+00        | -6.61E+00 | 4.26E+06  | 4.23E+06  | 4.90E+05  | 1.58E+00        | -7.90E+00 | 2.40E+06  | 2.37E+06  | 3.29E+05  |
| 1.26E+00        | -7.20E+00 | 4.31E+06  | 4.28E+06  | 5.40E+05  | 1.26E+00        | -8.55E+00 | 2.43E+06  | 2.41E+06  | 3.61E+05  |
| 1.00E+00        | -7.84E+00 | 4.38E+06  | 4.33E+06  | 5.96E+05  | 1.00E+00        | -9.26E+00 | 2.47E+06  | 2.44E+06  | 3.98E+05  |
| 7.94E-01        | -8.57E+00 | 4.44E+06  | 4.39E+06  | 6.62E+05  | 7.94E-01        | -1.00E+01 | 2.52E+06  | 2.48E+06  | 4.38E+05  |
| 6.31E-01        | -9.24E+00 | 4.52E+06  | 4.46E+06  | 7.25E+05  | 6.31E-01        | -1.08E+01 | 2.57E+06  | 2.52E+06  | 4.81E+05  |
| 5.01E-01        | -1.00E+01 | 4.60E+06  | 4.53E+06  | 7.99E+05  | 5.01E-01        | -1.17E+01 | 2.63E+06  | 2.57E+06  | 5.31E+05  |
| 3.98E-01        | -1.09E+01 | 4.69E+06  | 4.61E+06  | 8.87E+05  | 3.98E-01        | -1.25E+01 | 2.69E+06  | 2.62E+06  | 5.83E+05  |
| 3.16E-01        | -1.17E+01 | 4.80E+06  | 4.70E+06  | 9.74E+05  | 3.16E-01        | -1.35E+01 | 2.76E+06  | 2.68E+06  | 6.45E+05  |
| 2.51E-01        | -1.26E+01 | 4.91E+06  | 4.79E+06  | 1.07E+06  | 2.51E-01        | -1.46E+01 | 2.84E+06  | 2.75E+06  | 7.14E+05  |
| 2.00E-01        | -1.37E+01 | 5.03E+06  | 4.88E+06  | 1.19E+06  | 2.00E-01        | -1.56E+01 | 2.92E+06  | 2.81E+06  | 7.86E+05  |
| 1.58E-01        | -1.49E+01 | 5.19E+06  | 5.01E+06  | 1.33E+06  | 1.58E-01        | -1.68E+01 | 3.02E+06  | 2.89E+06  | 8.70E+05  |
| 1.26E-01        | -1.58E+01 | 5.34E+06  | 5.13E+06  | 1.46E+06  | 1.26E-01        | -1.78E+01 | 3.12E+06  | 2.97E+06  | 9.54E+05  |
| 1.00E-01        | -1.72E+01 | 5.52E+06  | 5.28E+06  | 1.63E+06  | 1.00E-01        | -1.92E+01 | 3.25E+06  | 3.07E+06  | 1.07E+06  |
| 7.94E-02        | -1.84E+01 | 5.71E+06  | 5.42E+06  | 1.80E+06  | 7.94E-02        | -2.04E+01 | 3.38E+06  | 3.17E+06  | 1.18E+06  |
| 6.31E-02        | -1.98E+01 | 5.96E+06  | 5.60E+06  | 2.02E+06  | 6.31E-02        | -2.20E+01 | 3.55E+06  | 3.29E+06  | 1.33E+06  |
| 5.01E-02        | -2.11E+01 | 6.20E+06  | 5.79E+06  | 2.23E+06  | 5.01E-02        | -2.33E+01 | 3.73E+06  | 3.42E+06  | 1.47E+06  |
| 3.98E-02        | -2.23E+01 | 6.52E+06  | 6.03E+06  | 2.48E+06  | 3.98E-02        | -2.48E+01 | 3.95E+06  | 3.58E+06  | 1.68E+06  |
| 3.16E-02        | -2.39E+01 | 6.86E+06  | 6.27E+06  | 2.78E+06  | 3.16E-02        | -2.61E+01 | 4.18E+06  | 3.75E+06  | 1.84E+06  |
| 2.51E-02        | -2.53E+01 | 7.22E+06  | 6.53E+06  | 3.08E+06  | 2.51E-02        | -2.76E+01 | 4.46E+06  | 3.95E+06  | 2.07E+06  |
| 2.00E-02        | -2.65E+01 | 7.66E+06  | 6.86E+06  | 3.41E+06  | 2.00E-02        | -2.87E+01 | 4.77E+06  | 4.18E+06  | 2.29E+06  |
| 1.59E-02        | -2.75E+01 | 8.16E+06  | 7.24E+06  | 3.77E+06  | 1.59E-02        | -2.97E+01 | 5.14E+06  | 4.46E+06  | 2.55E+06  |
| 1.26E-02        | -2.84E+01 | 8.73E+06  | 7.68E+06  | 4         |                 |           |           |           |           |

4. EIS spectra of pristine Li(BH<sub>3</sub>NH<sub>2</sub>BH<sub>2</sub>NH<sub>2</sub>BH<sub>3</sub>) at 40°C and 48°C

[3/4]

| Li(B3N2) / 40°C |           |           |           |           | Li(B3N2) / 48°C |           |           |           |           |
|-----------------|-----------|-----------|-----------|-----------|-----------------|-----------|-----------|-----------|-----------|
| f               | phi (f)   | mod z (f) | Z'        | Z'' (Z')  | f               | phi (f)   | mod z (f) | Z'        | Z'' (Z')  |
| 1.00E+07        | -6.31E+01 | 7.05E+03  | 3.19E+03  | 6.29E+03  | 1.00E+07        | -6.22E+01 | 6.93E+03  | 3.23E+03  | 6.12E+03  |
| 7.94E+06        | -4.43E+01 | 7.22E+03  | 5.17E+03  | 5.04E+03  | 7.94E+06        | -4.26E+01 | 7.07E+03  | 5.20E+03  | 4.79E+03  |
| 6.31E+06        | -8.06E+01 | 1.45E+04  | 2.36E+03  | 1.43E+04  | 6.31E+06        | -7.72E+01 | 1.42E+04  | 3.15E+03  | 1.39E+04  |
| 5.01E+06        | -7.71E+01 | 1.62E+04  | 3.65E+03  | 1.58E+04  | 5.01E+06        | -7.50E+01 | 1.57E+04  | 4.08E+03  | 1.52E+04  |
| 3.98E+06        | -8.70E+01 | 2.09E+04  | 1.10E+03  | 2.08E+04  | 3.98E+06        | -8.50E+01 | 2.04E+04  | 1.77E+03  | 2.03E+04  |
| 3.16E+06        | 8.35E+01  | 4.42E+04  | -5.06E+03 | 4.39E+04  | 3.16E+06        | 8.76E+01  | 4.27E+04  | -1.82E+03 | 4.27E+04  |
| 2.51E+06        | 8.63E+01  | 2.82E+04  | -1.83E+03 | 2.82E+04  | 2.51E+06        | 8.84E+01  | 2.77E+04  | -7.75E+02 | 2.76E+04  |
| 2.00E+06        | -1.38E+01 | 1.21E+05  | -1.17E+05 | -2.89E+04 | 2.00E+06        | -1.21E+01 | 1.41E+05  | -1.38E+05 | -2.96E+04 |
| 1.58E+06        | -6.13E+01 | 2.55E+05  | 1.22E+05  | 2.23E+05  | 1.58E+06        | -5.39E+01 | 2.02E+05  | 1.19E+05  | 1.64E+05  |
| 1.26E+06        | -6.28E+01 | 1.85E+05  | 8.48E+04  | 1.65E+05  | 1.26E+06        | -5.70E+01 | 1.59E+05  | 8.65E+04  | 1.33E+05  |
| 1.00E+06        | -6.12E+01 | 1.97E+05  | 9.51E+04  | 1.73E+05  | 1.00E+06        | -5.57E+01 | 1.70E+05  | 9.58E+04  | 1.40E+05  |
| 7.94E+05        | -6.16E+01 | 2.21E+05  | 1.05E+05  | 1.94E+05  | 7.94E+05        | -5.56E+01 | 1.89E+05  | 1.07E+05  | 1.56E+05  |
| 6.31E+05        | -5.99E+01 | 2.55E+05  | 1.28E+05  | 2.20E+05  | 6.31E+05        | -5.35E+01 | 2.16E+05  | 1.28E+05  | 1.74E+05  |
| 5.01E+05        | -5.77E+01 | 2.96E+05  | 1.58E+05  | 2.50E+05  | 5.01E+05        | -5.09E+01 | 2.47E+05  | 1.56E+05  | 1.92E+05  |
| 3.98E+05        | -5.51E+01 | 3.42E+05  | 1.96E+05  | 2.81E+05  | 3.98E+05        | -4.79E+01 | 2.81E+05  | 1.88E+05  | 2.08E+05  |
| 3.16E+05        | -5.22E+01 | 3.94E+05  | 2.42E+05  | 3.11E+05  | 3.16E+05        | -4.47E+01 | 3.17E+05  | 2.25E+05  | 2.23E+05  |
| 2.51E+05        | -4.91E+01 | 4.51E+05  | 2.95E+05  | 3.40E+05  | 2.51E+05        | -4.13E+01 | 3.54E+05  | 2.66E+05  | 2.34E+05  |
| 2.00E+05        | -4.58E+01 | 5.11E+05  | 3.57E+05  | 3.66E+05  | 2.00E+05        | -3.78E+01 | 3.92E+05  | 3.10E+05  | 2.41E+05  |
| 1.58E+05        | -4.23E+01 | 5.73E+05  | 4.24E+05  | 3.86E+05  | 1.58E+05        | -3.43E+01 | 4.30E+05  | 3.55E+05  | 2.42E+05  |
| 1.26E+05        | -3.88E+01 | 6.36E+05  | 4.96E+05  | 3.98E+05  | 1.26E+05        | -3.09E+01 | 4.65E+05  | 3.99E+05  | 2.39E+05  |
| 1.00E+05        | -3.52E+01 | 6.98E+05  | 5.71E+05  | 4.02E+05  | 1.00E+05        | -2.75E+01 | 4.99E+05  | 4.42E+05  | 2.31E+05  |
| 7.94E+04        | -3.17E+01 | 7.57E+05  | 6.44E+05  | 3.98E+05  | 7.94E+04        | -2.44E+01 | 5.29E+05  | 4.82E+05  | 2.18E+05  |
| 6.31E+04        | -2.83E+01 | 8.12E+05  | 7.15E+05  | 3.85E+05  | 6.31E+04        | -2.14E+01 | 5.56E+05  | 5.17E+05  | 2.03E+05  |
| 5.01E+04        | -2.52E+01 | 8.62E+05  | 7.80E+05  | 3.67E+05  | 5.01E+04        | -1.88E+01 | 5.79E+05  | 5.48E+05  | 1.86E+05  |
| 3.98E+04        | -2.24E+01 | 9.08E+05  | 8.39E+05  | 3.46E+05  | 3.98E+04        | -1.65E+01 | 6.00E+05  | 5.75E+05  | 1.70E+05  |
| 3.16E+04        | -1.99E+01 | 9.50E+05  | 8.93E+05  | 3.23E+05  | 3.16E+04        | -1.44E+01 | 6.18E+05  | 5.98E+05  | 1.54E+05  |
| 2.51E+04        | -1.76E+01 | 9.88E+05  | 9.42E+05  | 2.99E+05  | 2.51E+04        | -1.26E+01 | 6.34E+05  | 6.19E+05  | 1.38E+05  |
| 2.00E+04        | -1.55E+01 | 1.02E+06  | 9.86E+05  | 2.73E+05  | 2.00E+04        | -1.10E+01 | 6.49E+05  | 6.37E+05  | 1.23E+05  |
| 1.58E+04        | -1.35E+01 | 1.05E+06  | 1.02E+06  | 2.47E+05  | 1.58E+04        | -9.50E+00 | 6.61E+05  | 6.52E+05  | 1.09E+05  |
| 1.26E+04        | -1.18E+01 | 1.08E+06  | 1.06E+06  | 2.21E+05  | 1.26E+04        | -8.21E+00 | 6.72E+05  | 6.65E+05  | 9.59E+04  |
| 1.00E+04        | -1.02E+01 | 1.10E+06  | 1.09E+06  | 1.96E+05  | 1.00E+04        | -7.07E+00 | 6.81E+05  | 6.76E+05  | 8.38E+04  |
| 7.94E+03        | -8.88E+00 | 1.12E+06  | 1.11E+06  | 1.73E+05  | 7.94E+03        | -6.09E+00 | 6.89E+05  | 6.85E+05  | 7.31E+04  |
| 6.31E+03        | -7.67E+00 | 1.14E+06  | 1.13E+06  | 1.52E+05  | 6.31E+03        | -5.23E+00 | 6.95E+05  | 6.93E+05  | 6.34E+04  |
| 5.01E+03        | -6.64E+00 | 1.15E+06  | 1.15E+06  | 1.33E+05  | 5.01E+03        | -4.52E+00 | 7.01E+05  | 6.99E+05  | 5.52E+04  |
| 3.98E+03        | -5.73E+00 | 1.17E+06  | 1.16E+06  | 1.16E+05  | 3.98E+03        | -3.89E+00 | 7.05E+05  | 7.04E+05  | 4.78E+04  |
| 3.16E+03        | -4.97E+00 | 1.18E+06  | 1.17E+06  | 1.02E+05  | 3.16E+03        | -3.36E+00 | 7.09E+05  | 7.08E+05  | 4.16E+04  |
| 2.51E+03        | -4.33E+00 | 1.19E+06  | 1.18E+06  | 8.95E+04  | 2.51E+03        | -2.93E+00 | 7.13E+05  | 7.12E+05  | 3.65E+04  |
| 2.00E+03        | -3.77E+00 | 1.19E+06  | 1.19E+06  | 7.84E+04  | 2.00E+03        | -2.56E+00 | 7.16E+05  | 7.15E+05  | 3.20E+04  |
| 1.58E+03        | -3.31E+00 | 1.20E+06  | 1.20E+06  | 6.92E+04  | 1.58E+03        | -2.26E+00 | 7.18E+05  | 7.18E+05  | 2.83E+04  |
| 1.26E+03        | -2.91E+00 | 1.21E+06  | 1.21E+06  | 6.12E+04  | 1.26E+03        | -2.01E+00 | 7.21E+05  | 7.20E+05  | 2.53E+04  |
| 1.00E+03        | -2.59E+00 | 1.21E+06  | 1.21E+06  | 5.47E+04  | 1.00E+03        | -1.82E+00 | 7.23E+05  | 7.22E+05  | 2.29E+04  |
| 7.94E+02        | -2.33E+00 | 1.22E+06  | 1.21E+06  | 4.93E+04  | 7.94E+02        | -1.67E+00 | 7.25E+05  | 7.24E+05  | 2.11E+04  |
| 6.31E+02        | -2.11E+00 | 1.22E+06  | 1.22E+06  | 4.50E+04  | 6.31E+02        | -1.56E+00 | 7.26E+05  | 7.26E+05  | 1.97E+04  |
| 5.01E+02        | -1.95E+00 | 1.22E+06  | 1.22E+06  | 4.16E+04  | 5.01E+02        | -1.48E+00 | 7.28E+05  | 7.28E+05  | 1.88E+04  |
| 3.98E+02        | -1.82E+00 | 1.23E+06  | 1.23E+06  | 3.90E+04  | 3.98E+02        | -1.44E+00 | 7.30E+05  | 7.29E+05  | 1.83E+04  |
| 3.16E+02        | -1.74E+00 | 1.23E+06  | 1.23E+06  | 3.74E+04  | 3.16E+02        | -1.43E+00 | 7.31E+05  | 7.31E+05  | 1.82E+04  |
| 2.51E+02        | -1.70E+00 | 1.24E+06  | 1.23E+06  | 3.66E+04  | 2.51E+02        | -1.46E+00 | 7.33E+05  | 7.33E+05  | 1.86E+04  |
| 2.00E+02        | -1.68E+00 | 1.24E+06  | 1.24E+06  | 3.63E+04  | 2.00E+02        | -1.49E+00 | 7.35E+05  | 7.35E+05  | 1.92E+04  |
| 1.58E+02        | -1.70E+00 | 1.24E+06  | 1.24E+06  | 3.69E+04  | 1.58E+02        | -1.58E+00 | 7.37E+05  | 7.37E+05  | 2.03E+04  |
| 1.26E+02        | -1.75E+00 | 1.25E+06  | 1.24E+06  | 3.80E+04  | 1.26E+02        | -1.68E+00 | 7.39E+05  | 7.39E+05  | 2.16E+04  |
| 1.00E+02        | -1.83E+00 | 1.25E+06  | 1.25E+06  | 3.98E+04  | 1.00E+02        | -1.80E+00 | 7.41E+05  | 7.41E+05  | 2.33E+04  |
| 7.94E+01        | -1.92E+00 | 1.25E+06  | 1.25E+06  | 4.19E+04  | 7.94E+01        | -1.95E+00 | 7.44E+05  | 7.43E+05  | 2.53E+04  |
| 6.31E+01        | -2.06E+00 | 1.26E+06  | 1.26E+06  | 4.52E+04  | 6.31E+01        | -2.14E+00 | 7.46E+05  | 7.46E+05  | 2.79E+04  |
| 5.01E+01        | -2.26E+00 | 1.26E+06  | 1.26E+06  | 4.99E+04  | 5.01E+01        | -2.37E+00 | 7.49E+05  | 7.48E+05  | 3.09E+04  |
| 3.98E+01        | -2.43E+00 | 1.27E+06  | 1.27E+06  | 5.38E+04  | 3.98E+01        | -2.62E+00 | 7.53E+05  | 7.52E+05  | 3.44E+04  |
| 3.16E+01        | -2.66E+00 | 1.27E+06  | 1.27E+06  | 5.91E+04  | 3.16E+01        | -2.89E+00 | 7.57E+05  | 7.56E+05  | 3.82E+04  |
| 2.51E+01        | -2.92E+00 | 1.28E+06  | 1.28E+06  | 6.53E+04  | 2.51E+01        | -3.22E+00 | 7.61E+05  | 7.60E+05  | 4.28E+04  |
| 2.00E+01        | -3.22E+00 | 1.29E+06  | 1.29E+06  | 7.23E+04  | 2.00E+01        | -3.57E+00 | 7.66E+05  | 7.64E+05  | 4.77E+04  |
| 1.58E+01        | -3.55E+00 | 1.30E+06  | 1.29E+06  | 8.02E+04  | 1.58E+01        | -3.97E+00 | 7.71E+05  | 7.69E+05  | 5.34E+04  |
| 1.26E+01        | -3.92E+00 | 1.31E+06  | 1.30E+06  | 8.91E+04  | 1.26E+01        | -4.41E+00 | 7.77E+05  | 7.75E+05  | 5.97E+04  |
| 1.00E+01        | -4.32E+00 | 1.32E+06  | 1.31E+06  | 9.91E+04  | 1.00E+01        | -4.89E+00 | 7.84E+05  | 7.81E+05  | 6.68E+04  |
| 7.94E+00        | -4.76E+00 | 1.33E+06  | 1.32E+06  | 1.10E+05  | 7.94E+00        | -5.41E+00 | 7.92E+05  | 7.88E+05  | 7.47E+04  |
| 6.31E+00        | -5.24E+00 | 1.34E+06  | 1.34E+06  | 1.22E+05  | 6.31E+00        | -5.98E+00 | 8.01E+05  | 7.96E+05  | 8.33E+04  |
| 5.01E+00        | -5.76E+00 | 1.36E+06  | 1.35E+06  | 1.36E+05  | 5.01E+00        | -6.58E+00 | 8.11E+05  | 8.05E+05  | 9.29E+04  |
| 3.98E+00        | -6.31E+00 | 1.37E+06  | 1.36E+06  | 1.51E+05  | 3.98E+00        | -7.23E+00 | 8.22E+05  | 8.15E+05  | 1.03E+05  |
| 3.16E+00        | -6.91E+00 | 1.39E+06  | 1.38E+06  | 1.67E+05  | 3.16E+00        | -7.91E+00 | 8.34E+05  | 8.26E+05  | 1.15E+05  |
| 2.51E+00        | -7.53E+00 | 1.41E+06  | 1.40E+06  | 1.85E+05  | 2.51E+00        | -8.64E+00 | 8.47E+05  | 8.38E+05  | 1.27E+05  |
| 2.00E+00        | -8.19E+00 | 1.43E+06  | 1.42E+06  | 2.04E+05  | 2.00E+00        | -9.40E+00 | 8.63E+05  | 8.51E+05  | 1.41E+05  |
| 1.58E+00        | -8.89E+00 | 1.45E+06  | 1.44E+06  | 2.25E+05  | 1.58E+00        | -1.02E+01 | 8.80E+05  | 8.66E+05  | 1.55E+05  |
| 1.26E+00        | -9.65E+00 | 1.48E+06  | 1.46E+06  | 2.48E+05  | 1.26E+00        | -1.10E+01 | 8.98E+05  | 8.81E+05  | 1.72E+05  |
| 1.00E+00        | -1.05E+01 | 1.51E+06  | 1.49E+06  | 2.75E+05  | 1.00E+00        | -1.19E+01 | 9.20E+05  | 9.00E+05  | 1.90E+05  |
| 7.94E-01        | -1.13E+01 | 1.54E+06  | 1.51E+06  | 3.02E+05  | 7.94E-01        | -1.28E+01 | 9.43E+05  | 9.20E+05  | 2.09E+05  |
| 6.31E-01        | -1.21E+01 | 1.58E+06  | 1.54E+06  | 3.31E+05  | 6.31E-01        | -1.37E+01 | 9.68E+05  | 9.40E+05  | 2.29E+05  |
| 5.01E-01        | -1.30E+01 | 1.62E+06  | 1.58E+06  | 3.64E+05  | 5.01E-01        | -1.46E+01 | 9.98E+05  | 9.66E+05  | 2.52E+05  |
| 3.98E-01        | -1.40E+01 | 1.66E+06  | 1.61E+06  | 4.03E+05  | 3.98E-01        | -1.57E+01 | 1.03E+06  | 9.90E+05  | 2.78E+05  |
| 3.16E-01        | -1.50E+01 | 1.71E+06  | 1.65E+06  | 4.42E+05  | 3.16E-01        | -1.67E+01 | 1.06E+06  | 1.02E+06  | 3.05E+05  |
| 2.51E-01        | -1.61E+01 | 1.77E+06  | 1.70E+06  | 4.88E+05  | 2.51E-01        | -1.78E+01 | 1.10E+06  | 1.05E+06  | 3.36E+05  |
| 2.00E-01        | -1.72E+01 | 1.83E+06  | 1.75E+06  | 5.41E+05  | 2.00E-01        | -1.89E+01 | 1.15E+06  | 1.09E+06  | 3.72E+05  |
| 1.58E-01        | -1.84E+01 | 1.90E+06  | 1.80E+06  | 5.99E+05  | 1.58E-01        | -2.00E+01 | 1.20E+06  | 1.13E+06  | 4.10E+05  |
| 1.26E-01        | -1.96E+01 | 1.98E+06  | 1.86E+06  | 6.61E+05  | 1.26E-01        | -2.12E+01 | 1.25E+06  | 1.17E+06  | 4.53E+05  |
| 1.00E-01        | -2.07E+01 | 2.07E+06  | 1.93E+06  | 7.30E+05  | 1.00E-01        | -2.25E+01 | 1.31E+06  | 1.22E+06  | 5.02E+05  |
| 7.94E-02        | -2.22E+01 | 2.17E+06  | 2.01E+06  | 8.21E+05  | 7.94E-02        | -2.35E+01 | 1.39E+06  | 1.27E+06  | 5.54E+05  |
| 6.31E-02        | -2.35E+01 | 2.28E+06  | 2.09E+06  | 9.08E+05  | 6.31E-02        | -2.48E+01 | 1.47E+06  | 1.34E+06  | 6.19E+05  |
| 5.01E-02        | -2.49E+01 | 2.42E+06  | 2.20E+06  | 1.02E+06  | 5.01E-02        | -2.62E+01 | 1.56E+06  | 1.40E+06  | 6.90E+05  |
| 3.98E-02        | -2.62E+01 | 2.56E+06  | 2.30E+06  | 1.13E+06  | 3.98E-02        | -2.72E+01 | 1.66E+06  | 1.48E+06  | 7.59E+05  |
| 3.16E-02        | -2.72E+01 | 2.74E+06  | 2.43E+06  | 1.25E+06  | 3.16E-02        | -2.82E+01 | 1.78E+06  | 1.57E+06  | 8.42E+05  |
| 2.51E-02        | -2.87E+01 | 2.94E+06  | 2.58E+06  | 1.41E+06  | 2.51E-02        | -2.92E+01 | 1.92E+06  | 1.68E+06  | 9.34E+05  |
| 2.00E-02        | -2.97E+01 | 3.15E+06  | 2.74E+06  | 1.56E+06  | 2.00E-02        | -3.01E+01 | 2.07E+06  | 1.79E+06  | 1.04E+06  |
| 1.59E-02        | -3.04E+01 | 3.39E+06  | 2.92E+06  | 1.71E+06  | 1.59E-02        | -3.08E+01 | 2.23E+06  | 1.91E+06  | 1.14E+06  |
| 1.26E-02        | -3.10E+01 | 3.66E+06  | 3.14E+06  | 1         |                 |           |           |           |           |

4. EIS spectra of pristine Li(BH<sub>3</sub>NH<sub>2</sub>BH<sub>2</sub>NH<sub>2</sub>BH<sub>3</sub>) at 56°C and 65°C

[4/4]

| Li(B3N2) / 56°C |           |           |           |           | Li(B3N2) / 65°C |           |           |           |           |
|-----------------|-----------|-----------|-----------|-----------|-----------------|-----------|-----------|-----------|-----------|
| f               | phi (f)   | mod z (f) | Z'        | Z'' (Z')  | f               | phi (f)   | mod z (f) | Z'        | Z'' (Z')  |
| 1.00E+07        | -6.08E+01 | 6.71E+03  | 3.27E+03  | 5.86E+03  | 1.00E+07        | -5.83E+01 | 6.55E+03  | 3.45E+03  | 5.57E+03  |
| 7.94E+06        | -4.05E+01 | 6.89E+03  | 5.24E+03  | 4.48E+03  | 7.94E+06        | -3.76E+01 | 6.66E+03  | 5.28E+03  | 4.06E+03  |
| 6.31E+06        | -7.34E+01 | 1.38E+04  | 3.94E+03  | 1.32E+04  | 6.31E+06        | -6.81E+01 | 1.34E+04  | 5.01E+03  | 1.24E+04  |
| 5.01E+06        | -7.24E+01 | 1.52E+04  | 4.61E+03  | 1.45E+04  | 5.01E+06        | -6.89E+01 | 1.45E+04  | 5.23E+03  | 1.35E+04  |
| 3.98E+06        | -8.16E+01 | 1.98E+04  | 2.89E+03  | 1.96E+04  | 3.98E+06        | -7.83E+01 | 1.90E+04  | 3.88E+03  | 1.86E+04  |
| 3.16E+06        | -8.69E+01 | 4.08E+04  | 2.22E+03  | 4.07E+04  | 3.16E+06        | -8.07E+01 | 3.85E+04  | 6.22E+03  | 3.80E+04  |
| 2.51E+06        | -8.88E+01 | 2.68E+04  | 5.76E+02  | 2.68E+04  | 2.51E+06        | -8.49E+01 | 2.61E+04  | 2.32E+03  | 2.60E+04  |
| 2.00E+06        | -1.05E+01 | 1.85E+05  | -1.82E+05 | -3.36E+04 | 2.00E+06        | -7.27E+00 | 3.21E+05  | -3.18E+05 | -4.06E+04 |
| 1.58E+06        | -4.58E+01 | 1.56E+05  | 1.09E+05  | 1.12E+05  | 1.58E+06        | -3.83E+01 | 1.19E+05  | 9.35E+04  | 7.37E+04  |
| 1.26E+06        | -4.91E+01 | 1.32E+05  | 8.62E+04  | 9.95E+04  | 1.26E+06        | -4.22E+01 | 1.05E+05  | 7.81E+04  | 7.08E+04  |
| 1.00E+06        | -4.88E+01 | 1.40E+05  | 9.27E+04  | 1.06E+05  | 1.00E+06        | -4.15E+01 | 1.13E+05  | 8.43E+04  | 7.46E+04  |
| 7.94E+05        | -4.73E+01 | 1.56E+05  | 1.06E+05  | 1.14E+05  | 7.94E+05        | -3.97E+01 | 1.23E+05  | 9.47E+04  | 7.86E+04  |
| 6.31E+05        | -4.57E+01 | 1.74E+05  | 1.22E+05  | 1.25E+05  | 6.31E+05        | -3.71E+01 | 1.35E+05  | 1.08E+05  | 8.16E+04  |
| 5.01E+05        | -4.27E+01 | 1.95E+05  | 1.44E+05  | 1.32E+05  | 5.01E+05        | -3.41E+01 | 1.48E+05  | 1.23E+05  | 8.31E+04  |
| 3.98E+05        | -3.94E+01 | 2.17E+05  | 1.68E+05  | 1.38E+05  | 3.98E+05        | -3.10E+01 | 1.61E+05  | 1.38E+05  | 8.28E+04  |
| 3.16E+05        | -3.60E+01 | 2.39E+05  | 1.93E+05  | 1.40E+05  | 3.16E+05        | -2.78E+01 | 1.73E+05  | 1.53E+05  | 8.07E+04  |
| 2.51E+05        | -3.26E+01 | 2.60E+05  | 2.19E+05  | 1.40E+05  | 2.51E+05        | -2.50E+01 | 1.84E+05  | 1.67E+05  | 7.78E+04  |
| 2.00E+05        | -2.92E+01 | 2.81E+05  | 2.45E+05  | 1.37E+05  | 2.00E+05        | -2.20E+01 | 1.94E+05  | 1.80E+05  | 7.27E+04  |
| 1.58E+05        | -2.59E+01 | 2.99E+05  | 2.69E+05  | 1.31E+05  | 1.58E+05        | -1.92E+01 | 2.03E+05  | 1.92E+05  | 6.67E+04  |
| 1.26E+05        | -2.29E+01 | 3.16E+05  | 2.91E+05  | 1.23E+05  | 1.26E+05        | -1.67E+01 | 2.11E+05  | 2.02E+05  | 6.03E+04  |
| 1.00E+05        | -2.00E+01 | 3.31E+05  | 3.11E+05  | 1.13E+05  | 1.00E+05        | -1.44E+01 | 2.17E+05  | 2.10E+05  | 5.39E+04  |
| 7.94E+04        | -1.74E+01 | 3.44E+05  | 3.28E+05  | 1.03E+05  | 7.94E+04        | -1.24E+01 | 2.22E+05  | 2.17E+05  | 4.76E+04  |
| 6.31E+04        | -1.51E+01 | 3.55E+05  | 3.42E+05  | 9.22E+04  | 6.31E+04        | -1.06E+01 | 2.27E+05  | 2.23E+05  | 4.17E+04  |
| 5.01E+04        | -1.31E+01 | 3.64E+05  | 3.55E+05  | 8.22E+04  | 5.01E+04        | -9.11E+00 | 2.31E+05  | 2.28E+05  | 3.65E+04  |
| 3.98E+04        | -1.13E+01 | 3.72E+05  | 3.65E+05  | 7.29E+04  | 3.98E+04        | -7.83E+00 | 2.34E+05  | 2.32E+05  | 3.19E+04  |
| 3.16E+04        | -9.82E+00 | 3.79E+05  | 3.79E+05  | 6.46E+04  | 3.16E+04        | -6.74E+00 | 2.37E+05  | 2.35E+05  | 2.78E+04  |
| 2.51E+04        | -8.50E+00 | 3.85E+05  | 3.81E+05  | 5.69E+04  | 2.51E+04        | -5.81E+00 | 2.39E+05  | 2.38E+05  | 2.42E+04  |
| 2.00E+04        | -7.33E+00 | 3.90E+05  | 3.87E+05  | 4.98E+04  | 2.00E+04        | -4.98E+00 | 2.41E+05  | 2.40E+05  | 2.09E+04  |
| 1.58E+04        | -6.31E+00 | 3.95E+05  | 3.92E+05  | 4.34E+04  | 1.58E+04        | -4.27E+00 | 2.43E+05  | 2.42E+05  | 1.81E+04  |
| 1.26E+04        | -5.43E+00 | 3.99E+05  | 3.97E+05  | 3.77E+04  | 1.26E+04        | -3.67E+00 | 2.44E+05  | 2.44E+05  | 1.56E+04  |
| 1.00E+04        | -4.67E+00 | 4.02E+05  | 4.01E+05  | 3.27E+04  | 1.00E+04        | -3.16E+00 | 2.46E+05  | 2.45E+05  | 1.35E+04  |
| 7.94E+03        | -4.03E+00 | 4.05E+05  | 4.04E+05  | 2.84E+04  | 7.94E+03        | -2.73E+00 | 2.47E+05  | 2.46E+05  | 1.18E+04  |
| 6.31E+03        | -3.44E+00 | 4.07E+05  | 4.06E+05  | 2.44E+04  | 6.31E+03        | -2.36E+00 | 2.48E+05  | 2.47E+05  | 1.02E+04  |
| 5.01E+03        | -2.98E+00 | 4.09E+05  | 4.09E+05  | 2.13E+04  | 5.01E+03        | -2.07E+00 | 2.48E+05  | 2.48E+05  | 8.99E+03  |
| 3.98E+03        | -2.58E+00 | 4.11E+05  | 4.10E+05  | 1.85E+04  | 3.98E+03        | -1.82E+00 | 2.49E+05  | 2.49E+05  | 7.91E+03  |
| 3.16E+03        | -2.26E+00 | 4.12E+05  | 4.12E+05  | 1.63E+04  | 3.16E+03        | -1.63E+00 | 2.50E+05  | 2.50E+05  | 7.10E+03  |
| 2.51E+03        | -2.00E+00 | 4.14E+05  | 4.13E+05  | 1.45E+04  | 2.51E+03        | -1.49E+00 | 2.50E+05  | 2.50E+05  | 6.49E+03  |
| 2.00E+03        | -1.78E+00 | 4.15E+05  | 4.14E+05  | 1.29E+04  | 2.00E+03        | -1.37E+00 | 2.51E+05  | 2.51E+05  | 5.99E+03  |
| 1.58E+03        | -1.62E+00 | 4.16E+05  | 4.15E+05  | 1.17E+04  | 1.58E+03        | -1.30E+00 | 2.51E+05  | 2.51E+05  | 5.68E+03  |
| 1.26E+03        | -1.49E+00 | 4.17E+05  | 4.16E+05  | 1.08E+04  | 1.26E+03        | -1.24E+00 | 2.52E+05  | 2.52E+05  | 5.46E+03  |
| 1.00E+03        | -1.40E+00 | 4.18E+05  | 4.17E+05  | 1.02E+04  | 1.00E+03        | -1.23E+00 | 2.52E+05  | 2.52E+05  | 5.40E+03  |
| 7.94E+02        | -1.34E+00 | 4.18E+05  | 4.18E+05  | 9.81E+03  | 7.94E+02        | -1.24E+00 | 2.53E+05  | 2.53E+05  | 5.45E+03  |
| 6.31E+02        | -1.31E+00 | 4.19E+05  | 4.19E+05  | 9.61E+03  | 6.31E+02        | -1.26E+00 | 2.53E+05  | 2.53E+05  | 5.59E+03  |
| 5.01E+02        | -1.32E+00 | 4.20E+05  | 4.20E+05  | 9.64E+03  | 5.01E+02        | -1.32E+00 | 2.54E+05  | 2.54E+05  | 5.85E+03  |
| 3.98E+02        | -1.34E+00 | 4.21E+05  | 4.21E+05  | 9.88E+03  | 3.98E+02        | -1.40E+00 | 2.55E+05  | 2.55E+05  | 6.22E+03  |
| 3.16E+02        | -1.40E+00 | 4.22E+05  | 4.22E+05  | 1.03E+04  | 3.16E+02        | -1.50E+00 | 2.55E+05  | 2.55E+05  | 6.69E+03  |
| 2.51E+02        | -1.48E+00 | 4.23E+05  | 4.23E+05  | 1.10E+04  | 2.51E+02        | -1.63E+00 | 2.56E+05  | 2.56E+05  | 7.28E+03  |
| 2.00E+02        | -1.58E+00 | 4.24E+05  | 4.24E+05  | 1.17E+04  | 2.00E+02        | -1.77E+00 | 2.57E+05  | 2.57E+05  | 7.91E+03  |
| 1.58E+02        | -1.72E+00 | 4.25E+05  | 4.25E+05  | 1.27E+04  | 1.58E+02        | -1.95E+00 | 2.58E+05  | 2.57E+05  | 8.74E+03  |
| 1.26E+02        | -1.87E+00 | 4.27E+05  | 4.26E+05  | 1.40E+04  | 1.26E+02        | -2.14E+00 | 2.59E+05  | 2.58E+05  | 9.66E+03  |
| 1.00E+02        | -2.05E+00 | 4.28E+05  | 4.28E+05  | 1.53E+04  | 1.00E+02        | -2.36E+00 | 2.60E+05  | 2.59E+05  | 1.07E+04  |
| 7.94E+01        | -2.24E+00 | 4.30E+05  | 4.30E+05  | 1.68E+04  | 7.94E+01        | -2.59E+00 | 2.61E+05  | 2.61E+05  | 1.18E+04  |
| 6.31E+01        | -2.50E+00 | 4.32E+05  | 4.31E+05  | 1.88E+04  | 6.31E+01        | -2.89E+00 | 2.62E+05  | 2.62E+05  | 1.32E+04  |
| 5.01E+01        | -2.75E+00 | 4.34E+05  | 4.33E+05  | 2.08E+04  | 5.01E+01        | -3.20E+00 | 2.64E+05  | 2.63E+05  | 1.47E+04  |
| 3.98E+01        | -3.08E+00 | 4.36E+05  | 4.36E+05  | 2.34E+04  | 3.98E+01        | -3.55E+00 | 2.65E+05  | 2.65E+05  | 1.64E+04  |
| 3.16E+01        | -3.41E+00 | 4.39E+05  | 4.38E+05  | 2.61E+04  | 3.16E+01        | -3.93E+00 | 2.67E+05  | 2.67E+05  | 1.83E+04  |
| 2.51E+01        | -3.80E+00 | 4.42E+05  | 4.41E+05  | 2.93E+04  | 2.51E+01        | -4.36E+00 | 2.69E+05  | 2.68E+05  | 2.05E+04  |
| 2.00E+01        | -4.21E+00 | 4.45E+05  | 4.44E+05  | 3.27E+04  | 2.00E+01        | -4.83E+00 | 2.72E+05  | 2.71E+05  | 2.29E+04  |
| 1.58E+01        | -4.66E+00 | 4.49E+05  | 4.47E+05  | 3.64E+04  | 1.58E+01        | -5.34E+00 | 2.74E+05  | 2.73E+05  | 2.55E+04  |
| 1.26E+01        | -5.17E+00 | 4.53E+05  | 4.51E+05  | 4.08E+04  | 1.26E+01        | -5.90E+00 | 2.77E+05  | 2.76E+05  | 2.84E+04  |
| 1.00E+01        | -5.72E+00 | 4.58E+05  | 4.55E+05  | 4.56E+04  | 1.00E+01        | -6.50E+00 | 2.80E+05  | 2.78E+05  | 3.17E+04  |
| 7.94E+00        | -6.31E+00 | 4.63E+05  | 4.60E+05  | 5.09E+04  | 7.94E+00        | -7.15E+00 | 2.84E+05  | 2.82E+05  | 3.53E+04  |
| 6.31E+00        | -6.95E+00 | 4.69E+05  | 4.65E+05  | 5.67E+04  | 6.31E+00        | -7.86E+00 | 2.88E+05  | 2.85E+05  | 3.93E+04  |
| 5.01E+00        | -7.65E+00 | 4.75E+05  | 4.71E+05  | 6.32E+04  | 5.01E+00        | -8.60E+00 | 2.92E+05  | 2.89E+05  | 4.37E+04  |
| 3.98E+00        | -8.38E+00 | 4.82E+05  | 4.77E+05  | 7.03E+04  | 3.98E+00        | -9.40E+00 | 2.98E+05  | 2.94E+05  | 4.86E+04  |
| 3.16E+00        | -9.16E+00 | 4.91E+05  | 4.84E+05  | 7.81E+04  | 3.16E+00        | -1.02E+01 | 3.03E+05  | 2.98E+05  | 5.39E+04  |
| 2.51E+00        | -9.98E+00 | 5.00E+05  | 4.92E+05  | 8.66E+04  | 2.51E+00        | -1.11E+01 | 3.09E+05  | 3.04E+05  | 5.96E+04  |
| 2.00E+00        | -1.08E+01 | 5.10E+05  | 5.01E+05  | 9.60E+04  | 2.00E+00        | -1.20E+01 | 3.17E+05  | 3.10E+05  | 6.60E+04  |
| 1.58E+00        | -1.18E+01 | 5.22E+05  | 5.11E+05  | 1.06E+05  | 1.58E+00        | -1.30E+01 | 3.25E+05  | 3.16E+05  | 7.30E+04  |
| 1.26E+00        | -1.27E+01 | 5.34E+05  | 5.21E+05  | 1.17E+05  | 1.26E+00        | -1.40E+01 | 3.33E+05  | 3.23E+05  | 8.05E+04  |
| 1.00E+00        | -1.37E+01 | 5.49E+05  | 5.33E+05  | 1.30E+05  | 1.00E+00        | -1.50E+01 | 3.43E+05  | 3.31E+05  | 8.90E+04  |
| 7.94E-01        | -1.47E+01 | 5.65E+05  | 5.47E+05  | 1.44E+05  | 7.94E-01        | -1.62E+01 | 3.54E+05  | 3.40E+05  | 9.89E+04  |
| 6.31E-01        | -1.57E+01 | 5.82E+05  | 5.61E+05  | 1.58E+05  | 6.31E-01        | -1.72E+01 | 3.66E+05  | 3.50E+05  | 1.08E+05  |
| 5.01E-01        | -1.68E+01 | 6.03E+05  | 5.77E+05  | 1.74E+05  | 5.01E-01        | -1.85E+01 | 3.81E+05  | 3.61E+05  | 1.21E+05  |
| 3.98E-01        | -1.80E+01 | 6.25E+05  | 5.94E+05  | 1.93E+05  | 3.98E-01        | -1.97E+01 | 3.96E+05  | 3.73E+05  | 1.33E+05  |
| 3.16E-01        | -1.90E+01 | 6.49E+05  | 6.14E+05  | 2.12E+05  | 3.16E-01        | -2.09E+01 | 4.14E+05  | 3.86E+05  | 1.47E+05  |
| 2.51E-01        | -2.02E+01 | 6.77E+05  | 6.36E+05  | 2.34E+05  | 2.51E-01        | -2.21E+01 | 4.33E+05  | 4.02E+05  | 1.63E+05  |
| 2.00E-01        | -2.14E+01 | 7.08E+05  | 6.59E+05  | 2.58E+05  | 2.00E-01        | -2.33E+01 | 4.56E+05  | 4.19E+05  | 1.80E+05  |
| 1.58E-01        | -2.27E+01 | 7.47E+05  | 6.89E+05  | 2.89E+05  | 1.58E-01        | -2.46E+01 | 4.83E+05  | 4.39E+05  | 2.01E+05  |
| 1.26E-01        | -2.38E+01 | 7.86E+05  | 7.19E+05  | 3.17E+05  | 1.26E-01        | -2.57E+01 | 5.12E+05  | 4.61E+05  | 2.22E+05  |
| 1.00E-01        | -2.52E+01 | 8.32E+05  | 7.53E+05  | 3.54E+05  | 1.00E-01        | -2.71E+01 | 5.46E+05  | 4.86E+05  | 2.48E+05  |
| 7.94E-02        | -2.62E+01 | 8.80E+05  | 7.90E+05  | 3.88E+05  | 7.94E-02        | -2.82E+01 | 5.82E+05  | 5.13E+05  | 2.74E+05  |
| 6.31E-02        | -2.74E+01 | 9.42E+05  | 8.36E+05  | 4.33E+05  | 6.31E-02        | -2.94E+01 | 6.25E+05  | 5.45E+05  | 3.06E+05  |
| 5.01E-02        | -2.88E+01 | 1.01E+06  | 8.83E+05  | 4.85E+05  | 5.01E-02        | -3.03E+01 | 6.71E+05  | 5.79E+05  | 3.38E+05  |
| 3.98E-02        | -2.98E+01 | 1.08E+06  | 9.36E+05  | 5.36E+05  | 3.98E-02        | -3.12E+01 | 7.27E+05  | 6.22E+05  | 3.76E+05  |
| 3.16E-02        | -3.06E+01 | 1.17E+06  | 1.00E+06  | 5.94E+05  | 3.16E-02        | -3.20E+01 | 7.90E+05  | 6.70E+05  | 4.19E+05  |
| 2.51E-02        | -3.16E+01 | 1.26E+06  | 1.08E+06  | 6.61E+05  | 2.51E-02        | -3.27E+01 | 8.60E+05  | 7.24E+05  | 4.65E+05  |
| 2.00E-02        | -3.24E+01 | 1.37E+06  | 1.15E+06  | 7.32E+05  | 2.00E-02        | -3.33E+01 | 9.35E+05  | 7.82E+05  | 5.13E+05  |
| 1.59E-02        | -3.28E+01 | 1.48E+06  | 1.24E+06  | 7.99E+05  | 1.59E-02        | -3.35E+01 | 1.01E+06  | 8.45E+05  | 5.59E+05  |
| 1.26E-02        | -3.29E+01 | 1.60E+06  | 1.34E+06  | 8         |                 |           |           |           |           |
